# Supplementary material
Source: Springer Nature journal article supplement (https://www.springermedizin.de/resource/supplementary/12891_2013_2011_MOESM3_ESM.pdf/9509482)

**Group A**

**Group B**

**Group N**

**8w:**

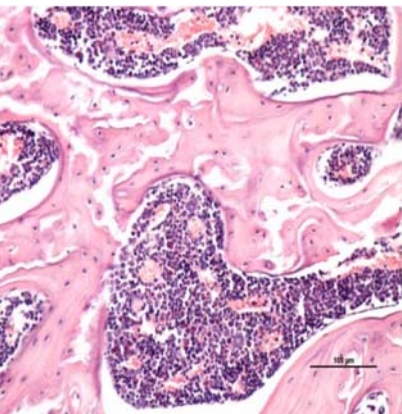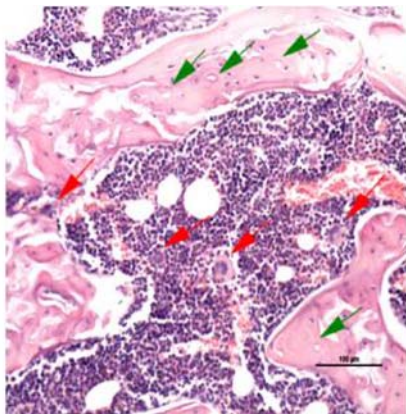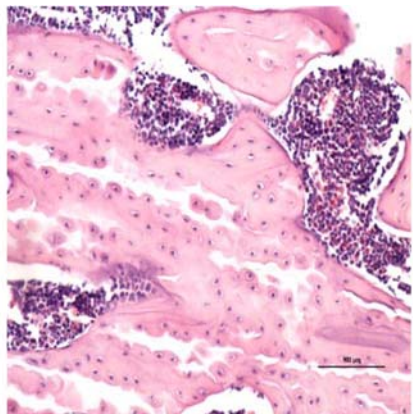

**10w:**

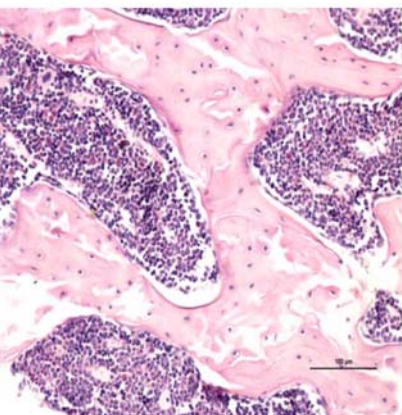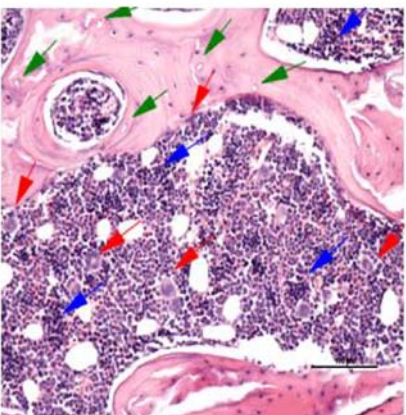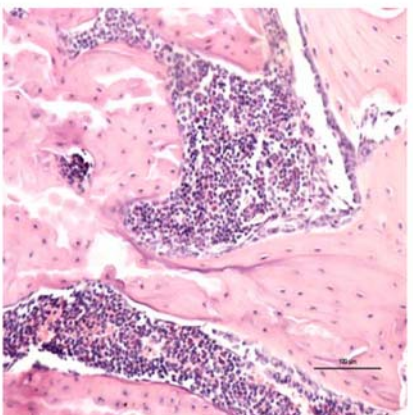

**12w:**

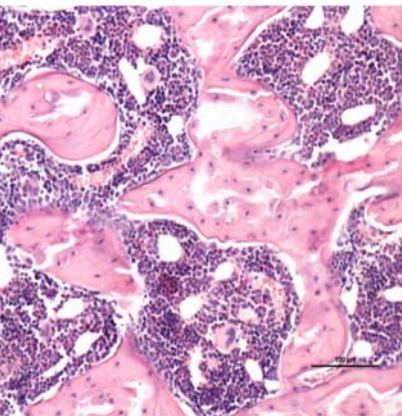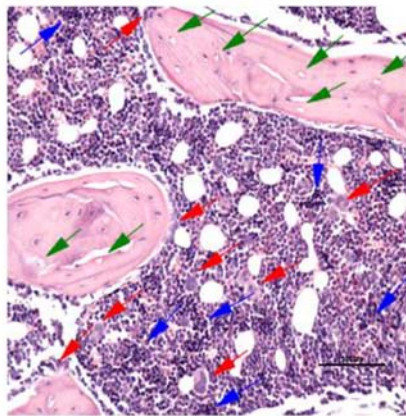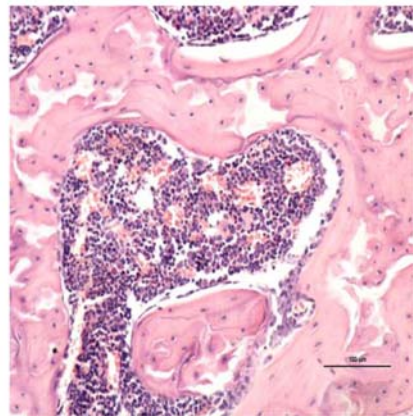

Supplement: MOESM3 [file 9509482]
